# Supplementary material for: An improved synthesis of poly(amidoamine)s for complexation with self-amplifying RNA and effective transfection
Source: Royal Society of Chemistry journal article supplement (doi:10.1039/d0py00912a), 2020-01-01
Supplement: d0py00912a1.pdf [file d0py00912a1.pdf]

### Supporting information for 'An improved synthesis of poly(amidoamine)s for complexation with self-amplifying RNA and effective transfection'

Pratik Gurnani,<sup>\*a</sup> Anna K. Blakney,<sup>b</sup> Jonathan Yeow,<sup>c</sup> Clément R. Bouton,<sup>b</sup> Robin J. Shattock,<sup>b</sup> Molly M. Stevens,<sup>c</sup> and Cameron Alexander<sup>a\*</sup>

a. Division of Molecular Therapeutics and Formulation, School of Pharmacy, University of Nottingham, NG7 2RD, UK

b. Department of Infectious Disease, Imperial College London, School of Medicine, St Mary's Hospital, Praed Street, London W2 1NY

c. Department of Materials and the Department of Bioengineering at Imperial College London. Prince Consort Rd, South Kensington, SW7 2AZ London, UK.

Table S1. Original, unoptimised conditions used to prepare pABOL.

| Reagent                                   | Mass (mg) | Volume ( $\mu\text{L}$ ) | Moles | Equivalents |
|-------------------------------------------|-----------|--------------------------|-------|-------------|
| 4-Amino-1-butanol (ABOL)                  | -         | 78                       | 0.840 | 1           |
| <i>N,N'</i> -cystaminebisacrylamide (CBA) | 221       | -                        | 0.840 | 1           |
| Triethylamine (TEA)                       | -         | 12                       | 0.084 | 0.1         |
| Methanol/Water mixture (4/1, v/v)         | -         | 176                      | -     | -           |

Table S2. Evolution of pABOL  $M_n$ ,  $M_w$  and  $\bar{D}$  over 336 h under [ABOL] = 0.60, [CBA] = 0.60, T = 45°C and an argon atmosphere.  
<sup>a</sup>Measured with DMF-SEC.

| Time (h) | $M_{n,SEC}$ ( $\text{g mol}^{-1}$ ) <sup>a</sup> | $M_{w,SEC}$ ( $\text{g mol}^{-1}$ ) <sup>a</sup> | $\bar{D}$ <sup>a</sup> |
|----------|--------------------------------------------------|--------------------------------------------------|------------------------|
| 24       | 2600                                             | 3600                                             | 1.38                   |
| 48       | 4000                                             | 6200                                             | 1.56                   |
| 72       | 5600                                             | 8800                                             | 1.58                   |
| 96       | 7200                                             | 12700                                            | 1.75                   |
| 168      | 14000                                            | 25700                                            | 1.84                   |
| 240      | 17900                                            | 47400                                            | 2.64                   |
| 336      | 20200                                            | 90700                                            | 4.49                   |

Table S3. Evolution of pABOL  $M_n$ ,  $M_w$  and  $\bar{D}$  over 336 h under [ABOL] = 0.60, [CBA] = 0.60, T = 45°C and an air atmosphere.  
<sup>a</sup>Measured with DMF-SEC.

| Time (h) | $M_{n,SEC}$ ( $\text{g mol}^{-1}$ ) <sup>a</sup> | $M_{w,SEC}$ ( $\text{g mol}^{-1}$ ) <sup>a</sup> | $\bar{D}$ <sup>a</sup> |
|----------|--------------------------------------------------|--------------------------------------------------|------------------------|
| 24       | 2800                                             | 3700                                             | 1.31                   |
| 48       | 3900                                             | 6100                                             | 1.57                   |
| 72       | 5000                                             | 8000                                             | 1.59                   |
| 96       | 5700                                             | 9700                                             | 1.69                   |
| 168      | 9100                                             | 13200                                            | 1.45                   |
| 240      | 10300                                            | 15700                                            | 1.52                   |
| 336      | 10200                                            | 15600                                            | 1.52                   |

Table S4. Evolution of pABOL  $M_n$ ,  $M_w$  and  $\bar{D}$  over 96 h under [ABOL] = 0.60, [CBA] = 0.60 and an air atmosphere under four different heating regimes, conventional heating at 25°C, 45°C and 60°C and microwave heating at 100°C. <sup>a</sup>Measured with DMF-SEC.

|                                 | Time (h) | $M_{n,SEC}$ (g mol <sup>-1</sup> ) <sup>a</sup> | $M_{w,SEC}$ (g mol <sup>-1</sup> ) <sup>a</sup> | $\bar{D}$ <sup>a</sup> |
|---------------------------------|----------|-------------------------------------------------|-------------------------------------------------|------------------------|
| 25°C<br>Conventional<br>Heating | 24       | 1700                                            | 1900                                            | 1.07                   |
|                                 | 48       | 2300                                            | 2800                                            | 1.22                   |
|                                 | 72       | 2700                                            | 3500                                            | 1.32                   |
|                                 | 96       | 3100                                            | 4300                                            | 1.41                   |
| 45°C<br>Conventional<br>Heating | 24       | 2800                                            | 3700                                            | 1.31                   |
|                                 | 48       | 3900                                            | 6100                                            | 1.57                   |
|                                 | 72       | 5000                                            | 8000                                            | 1.59                   |
|                                 | 96       | 5700                                            | 9700                                            | 1.69                   |
| 60°C<br>Conventional<br>Heating | 24       | 4500                                            | 6900                                            | 1.53                   |
|                                 | 48       | 8000                                            | 10800                                           | 1.35                   |
|                                 | 72       | 8600                                            | 12200                                           | 1.41                   |
|                                 | 96       | 9100                                            | 12900                                           | 1.41                   |
| 100°C<br>Microwave<br>Heating   | 0.5      | 2300                                            | 2700                                            | 1.13                   |
|                                 | 2        | 4000                                            | 5500                                            | 1.38                   |
|                                 | 4        | 5300                                            | 7800                                            | 1.48                   |
|                                 | 7        | 6400                                            | 10200                                           | 1.59                   |
|                                 | 24       | 10700                                           | 22600                                           | 2.12                   |

Table S5. Evolution of pABOL  $M_n$ ,  $M_w$  and  $\bar{D}$  over 72 h under an air atmosphere, T = 60°C and four different monomer concentrations where [ABOL] and [CBA] = 3.2 M, 0.8 M, 0.45 M and 0.24 M. <sup>a</sup>Measured with DMF-SEC.

| [M]  | Time (h) | $M_{n,SEC}$ (g mol <sup>-1</sup> ) <sup>a</sup> | $M_{w,SEC}$ (g mol <sup>-1</sup> ) <sup>a</sup> | $\bar{D}$ <sup>a</sup> |
|------|----------|-------------------------------------------------|-------------------------------------------------|------------------------|
| 3.2  | 24       | 7800                                            | 15100                                           | 1.93                   |
|      | 48       | 9600                                            | 21500                                           | 2.24                   |
|      | 72       | 15100                                           | 34100                                           | 2.26                   |
| 0.8  | 24       | 5400                                            | 8100                                            | 1.49                   |
|      | 48       | 8800                                            | 12000                                           | 1.35                   |
|      | 72       | 9400                                            | 13200                                           | 1.4                    |
| 0.45 | 24       | 3800                                            | 5000                                            | 1.31                   |
|      | 48       | 4900                                            | 7000                                            | 1.42                   |
|      | 72       | 5000                                            | 7800                                            | 1.57                   |
| 0.24 | 24       | 3100                                            | 3900                                            | 1.24                   |
|      | 48       | 3800                                            | 5100                                            | 1.34                   |
|      | 72       | 4500                                            | 6000                                            | 1.34                   |

Table S6. Effect of ABOL:CBA ratio on pABOL molar masses. Molar masses recorded after 48 h polymerisation performed at 60°C at [CBA] = 0.60 M under an air atmosphere. <sup>a</sup>Measured with DMF-SEC.

| <b>[ABOL]/[CBA]</b> | <b><math>M_{n,SEC}</math> (g mol<sup>-1</sup>)<sup>a</sup></b> | <b><math>M_{w,SEC}</math> (g mol<sup>-1</sup>)<sup>a</sup></b> | <b><math>\bar{D}^a</math></b> |
|---------------------|----------------------------------------------------------------|----------------------------------------------------------------|-------------------------------|
| 1                   | 5500                                                           | 8200                                                           | 1.49                          |
| 1.01                | 5500                                                           | 8400                                                           | 1.52                          |
| 1.025               | 4800                                                           | 6900                                                           | 1.43                          |
| 1.05                | 4700                                                           | 6700                                                           | 1.43                          |
| 1.10                | 4100                                                           | 5500                                                           | 1.34                          |
| 1.20                | No polymer detected                                            |                                                                |                               |

Table S7. Repeatability of 'old' and 'new' conditions. 'Old' conditions are [M] = 3.2 M, 45°C and an inert atmosphere whilst 'new' conditions refer to [M] = 0.6, 60°C and an air atmosphere. <sup>a</sup>Measured with DMF-SEC.

| <b>Polymerisation conditions</b> | <b>Replicate</b> | <b><math>M_{n,SEC}</math> (g mol<sup>-1</sup>)<sup>a</sup></b> | <b><math>M_{w,SEC}</math> (g mol<sup>-1</sup>)<sup>a</sup></b> | <b><math>\bar{D}^a</math></b> |
|----------------------------------|------------------|----------------------------------------------------------------|----------------------------------------------------------------|-------------------------------|
| Old                              | 1                | 6400                                                           | 8500                                                           | 1.32                          |
|                                  | 2                | 6900                                                           | 9000                                                           | 1.31                          |
|                                  | 3                | 7400                                                           | 9700                                                           | 1.32                          |
| New                              | 1                | 5600                                                           | 14200                                                          | 2.54                          |
|                                  | 2                | 3800                                                           | 12800                                                          | 3.35                          |
|                                  | 3                | 4900                                                           | 23100                                                          | 4.66                          |

Table S8. Molecular weight details and chromatogram features of polymers utilised in transfection studies. <sup>a</sup>Measured with DMF-SEC.

| <b>Polymer</b> | <b><math>M_{n,SEC}</math> (g mol<sup>-1</sup>)<sup>a</sup></b> | <b><math>M_{w,SEC}</math> (g mol<sup>-1</sup>)<sup>a</sup></b> | <b><math>\bar{D}^a</math></b> | <b>Chromatogram features</b> |
|----------------|----------------------------------------------------------------|----------------------------------------------------------------|-------------------------------|------------------------------|
| P1             | 14500                                                          | 36400                                                          | 2.51                          | Unimodal                     |
| P2             | 5500                                                           | 32800                                                          | 5.97                          | Bimodal                      |
| P3             | 4900                                                           | 40500                                                          | 8.27                          | Bimodal                      |
| P4             | 7300                                                           | 25600                                                          | 3.51                          | Unimodal                     |
| P5             | 5000                                                           | 13500                                                          | 2.70                          | Unimodal                     |
| P6             | 9100                                                           | 46000                                                          | 5.06                          | Bimodal                      |
